20 diagnostic methods employed. The overall prevalence of Animal African Trypanosomiasis (AAT)  
21 and Human African Trypanosomiasis (HAT) was 27.3% (4,404/16,117) and 3.6% (72/1,974)  
22 respectively. The highest incidence of HAT was detected using the Card Agglutination Test for  
23 Trypanosomiasis (CATT), whereas that of AAT was observed using PCR, followed by microscopy  
24 which was the most extensively employed technique in this study. The various diagnostic methods  
25 used in various studies showed a variety of sensitivities and specificities, affecting the accuracy of  
26 disease detection. Remarkably, domestic animals like cattle, pigs, and dogs were identified as  
27 potential reservoirs for the human-infective parasites (*T. b. gambiense*) in Nigeria.

## 28 **Conclusion**

29 This study highlights the high prevalence rate and complex epidemiology of African  
30 trypanosomiasis in humans and animals in Nigeria. These findings underscore the importance of  
31 comprehensive measures involving both veterinary and human health sectors to combat African  
32 trypanosomiasis effectively in Nigeria. Only few studies have investigated the prevalence of HAT  
33 in Nigeria. Hence, adequately coordinated epidemiological surveys are imperative to ascertain the  
34 true epidemiological status of HAT in Nigeria and inform targeted intervention policies to achieve  
35 WHO's NTD elimination targets in 2030.

36

37

## **INTRODUCTION**

38 African Trypanosomiasis (AT) is one of the Neglected Tropical Diseases (NTDs) with an  
39 estimated 60 million people at risk of infection in sub-Saharan Africa,<sup>1,2</sup> as well as various animals  
40 such as dogs, cattle, pigs, sheep and goats.<sup>3,4</sup> This vector-borne disease, caused by a protozoan

41 parasite of the genus *Trypanosoma*, are transmitted by tsetse flies to both humans and animals.<sup>5</sup>  
42 Animal African Trypanosomiasis (AAT), also known as Nagana, is caused by various  
43 trypanosome species, including *T. brucei*, *T. congolense*, *T. vivax*, *T. equiperdum*, *T. evansi*, *T.*  
44 *simiae*, *T. suis*, and *T. theileri*.<sup>6,7</sup> While cattle are the most affected, other animals such as goats,  
45 dogs, sheep, pigs, and wild animals are also susceptible.<sup>8</sup> *T. equiperdum* causes a venereal disease  
46 (Dourine) in horses and donkeys, while *T. evansi*, causes a form of trypanosomiasis known as  
47 Surra in horses, camels, buffaloes, mules, and deer.<sup>9</sup>

48 Two sub-species of *Trypanosoma brucei* cause Human African Trypanosomiasis (HAT), also  
49 known as sleeping sickness. *Trypanosoma brucei gambiense* (Tbg), found in 24 countries in West  
50 and Central Africa, is responsible for 97% of all reported cases, and causes a chronic disease.  
51 *Trypanosoma brucei rhodesiense* (Tbr), which is found in 13 countries in East and Southern  
52 Africa, is responsible for 3% of all reported cases and causes an acute disease.<sup>10</sup> Unlike Tbg,  
53 which mostly infects humans (although some animal reservoirs/hosts have been identified), Tbr  
54 causes disease in both humans and animals.<sup>11</sup>

55 The transmission of both HAT and AAT heavily depends on tsetse fly (*Glossina sp.*), exclusively  
56 found in sub-Saharan Africa.<sup>12</sup> Nevertheless, maternal and sexual transmission has been indicated  
57 for HAT, although their exact contributions to the epidemiology of the human disease has not been  
58 fully explored.<sup>13</sup> The coexistence of humans, vectors, and parasites in a conducive environment in  
59 the tropical trypanosomiasis belt of Africa, coupled with the presence of animal reservoir hosts,  
60 makes HAT a significant public health challenge, with detrimental effects on health, the economy,  
61 poverty levels, and agricultural productivity.<sup>14, 15</sup>

62 Reported cases of HAT globally have substantially declined to fewer than 1,000 cases between  
63 2019 and 2020.<sup>10</sup> This decline is attributed to HAT control strategies and inclusion in the Neglected

64 Tropical Diseases, with a roadmap aiming to eliminate gHAT as a public health concern by 2020  
65 and zero transmission to humans by 2030.<sup>16</sup> However, disease monitoring and epidemiological  
66 surveillance is grossly inadequate in many endemic countries.<sup>17</sup> One of the prerequisites for a  
67 disease to be eradicable is the absence of animal reservoirs.<sup>18</sup> Therefore, in addition to latent  
68 infections and inadequate diagnostic tools/capacity, the presence of potential animal reservoir  
69 hosts for both Tbg and Tbr is a major challenge to the complete elimination of HAT across sub-  
70 Saharan Africa including Nigeria.<sup>19, 20</sup>

71 Nonetheless, it is still unclear how important these non-human hosts are in maintaining the  
72 transmission of gHAT.<sup>21</sup> Without addressing the knowledge gaps regarding *T. b. gambiense*  
73 reservoirs, complete gHAT eradication remains unattainable.<sup>22</sup> To fill this gap, adequate  
74 epidemiological information about the co-circulation of human and animal trypanosomes is  
75 critical, as these sites could potentially present breeding grounds for new epidemic strains of the  
76 parasites. Therefore, this study examined the prevalence of African trypanosomiasis in both  
77 humans and animals in Nigeria, focusing on the complex interactions among disease transmission  
78 dynamics, parasite variation, diagnostic techniques, and possibility of cross infection between  
79 humans and animals.

## 80 **METHODS**

81 This study follows the Preferred Reporting Items for Systematic Reviews and Meta-Analyses  
82 (PRISMA-ScR) four-stage framework, encompassing identification, screening, eligibility  
83 assessment, and inclusion to ensure a transparent, accurate, and high-quality reporting of the  
84 review's findings.<sup>23</sup>

### 85 **Search Strategy**

86 The searches were performed using MEDLINE, CINAHL, and EMBASE in July 2023. The search  
87 terms included ‘Neglected Tropical Disease,’ ‘African trypanosomiasis,’ ‘human African  
88 trypanosomiasis,’ ‘animal African trypanosomiasis,’ ‘sleeping sickness,’ ‘nagana,’ ‘trypanosoma,’  
89 ‘trypanosomosis,’ ‘trypanosomes.’ These terms were combined using Boolean operators ‘OR’, as  
90 well as ‘AND’ to retrieve relevant articles. A manual search was also performed to ensure that all  
91 relevant studies were captured.

## 92 **Eligibility Criteria**

93 The eligibility criteria for this review were informed by participants (P), phenomena of interest (I),  
94 and context (Co) or PICo, where P is humans/animals with AT, I is African trypanosomiasis  
95 infection and Co is Nigeria. Primary studies including cross sectional, cohort, surveys, and  
96 prevalence studies that reported animal and human African trypanosomiasis infection were  
97 included. Specific inclusion criteria included studies from Nigeria, published in English language  
98 with well detailed sample size, prevalence of trypanosomiasis in sampled population, method of  
99 diagnosis and *Trypanosoma* species identified.

## 100 **Study Selection**

101 Study selection was performed independently by two authors. Discrepancies between the authors  
102 were resolved through discussion until a consensus was reached. After duplicates were removed,  
103 the remaining studies were screened based on their titles and abstracts. Subsequently, non-relevant  
104 studies were excluded, and the full text of the remaining studies were assessed according to the  
105 pre-defined eligibility criteria. Finally, studies that met the eligibility criteria were included for  
106 further data extraction.

## 107 **Data Extraction**

108 Studies were extracted into a pre-prepared Microsoft Excel spreadsheet with the following  
109 variables: author and year of publication, study subject (human, animal), type of study design,  
110 study size, *Trypanosoma* species identified, diagnostic method used, number of positive cases,  
111 prevalence, or percentages.

## 112 **Data Synthesis**

113 A narrative summary was performed to synthesize findings from this review.

## 114 **RESULTS**

115 A total of 1,977 articles were retrieved from the search of three databases. 59% (1,159) from  
116 MEDLINE, 36% (724) from EMBASE and 5% (94) from CINAHL. After removal of 40  
117 duplicates, 1,937 articles were screened for titles and abstracts. A total of 1,787 non-relevant  
118 articles were excluded in accordance with the predetermined criteria. Following full text retrieval,  
119 another 25 studies were excluded as their full texts were not accessible. Upon review of the full  
120 texts of the remaining 125 articles, a total of 11 were deemed eligible for inclusion in the study.  
121 An additional 5 articles were identified from a search of reference lists. Finally, 16 articles were  
122 included. The study selection process is represented in table I.

### 123 **Description of eligible studies**

124 All included studies were published between 1993 and 2021, with the number of study subjects  
125 ranging from 19 to 7,143 and an overall sample size of 18,091. Of the 16 included studies, three  
126 investigated human African trypanosomiasis,<sup>24, 25, 26</sup> while thirteen studies reported animal African  
127 trypanosomiasis. Five of these reported infection in cattle - bovine trypanosomiasis.<sup>27,28, 29, 30,31</sup>  
128 Two studies investigated trypanosomiasis infection in pigs – porcine trypanosomiasis.<sup>32, 33</sup> Three  
129 studies investigated infection in ruminants – sheep, goat, cattle,<sup>34,35,36</sup> while one study investigated

130 in dogs – canine trypanosomiasis.<sup>37</sup> The remaining two studies investigated infection in multiple  
131 animal hosts including monkey.<sup>38, 39</sup> Table II provides a summary of the included studies.

### 132 **Prevalence of HAT**

133 A total of 1,974 individuals underwent testing for the disease across three studies. Among them,  
134 72 individuals tested positive for the disease in two of the studies.<sup>24,25</sup> Notably, the third study  
135 conducted did not yield any positive cases within the sampled population.<sup>26</sup> The overall prevalence  
136 of HAT as examined by these studies is 3.6% (72/1,974) with *Trypanosoma brucei gambiense*  
137 detected as the causative organism.

### 138 **Prevalence of AAT**

139 Thirteen included studies reported AAT with an overall sample size of 16,117. The highest  
140 sampled animal was cattle at 12,193, while the least is monkey at 1 sample. Others are 577 sheep,  
141 418 goat, 2,639 pigs, 31 dogs, and 318 belonging to small ruminants (unspecified). Out of the total  
142 sampled animals, 4,404 were found positive for trypanosomiasis infection from all the 13 studies.  
143 The overall mean prevalence of AAT is 27.3% (4,404/16,117).

144 A total of 12 studies detected the animal infective trypanosomes: *T. vivax*, *T. congolense*, *T. brucei*,  
145 *T. simiae*, *T. evansi*, *T. theileri* in the studied samples. However, *T. vivax*, *T. congolense*, and *T.*  
146 *brucei* were the most prevalent. In addition to these trypanosomes, three of these studies detected  
147 the human infective parasite *Trypanosoma brucei gambiense* in the animals.<sup>33, 37, 38</sup>

### 148 **Diagnostic Techniques**

149 The included studies for this review utilized various diagnostic methods, including microscopy,  
150 CATT (Card Agglutination Test for Trypanosomiasis), and Polymerase Chain Reaction (PCR) in

151 the detection of trypanosomes. Overall, microscopy was the most utilized diagnostic technique of  
152 eleven studies. While the remaining studies utilized CATT and PCR, individually, together or in  
153 addition to microscopy.

154

155

## DISCUSSION

156 The findings from this review, provides comprehensive insights into the prevalence, species  
157 distribution, and diagnostics variations of African trypanosomiasis in humans and animals in  
158 Nigeria. According to this study's findings, the prevalence of AAT in Nigeria is 27.3% (4,404 out  
159 of 16,117), while prevalence of HAT is 3.6% (72 out of 1,974). This indicates that African  
160 trypanosomiasis is still endemic in both humans and animals in Nigeria. The presence of various  
161 trypanosome species and different diagnostic methods contributes to the complexity of this disease  
162 and its significance for public health. The study identified several trypanosomes, including *T.*  
163 *vivax*, *T. congolense*, *T. brucei brucei*, *T. simiae*, *T. evansi*, *T. theileri* and *T. brucei gambiense* as  
164 the causative pathogens of trypanosomiasis infection in animals and humans. Additionally, the  
165 most used diagnostic techniques in Nigeria, for detecting these trypanosomes are microscopic  
166 examination, CATT, and PCR.

### 167 **The Prevalence of human African trypanosomiasis in Nigeria**

168 Human African trypanosomiasis has been included in the Neglected Tropical Diseases Road map,  
169 aiming to eliminate HAT as a public health concern by 2020 and prevent the transmission of  
170 *Trypanosoma brucei gambiense* (Tbg) to humans by 2030.<sup>16</sup> The criteria for elimination are set at  
171 fewer than 2,000 reported cases annually and no more than 1 case per 10,000 residents in areas at  
172 moderate or high risk.<sup>17</sup> Several endemic African countries, such as Benin, Côte d'Ivoire,



173 Equatorial Guinea, Togo, and Uganda, have successfully eliminated gambiense Human African  
174 Trypanosomiasis (gHAT) as a public health problem.<sup>10</sup> However, Nigeria still faces challenges in  
175 achieving this goal. This study reveals that Nigeria has a higher prevalence rate of 3.6% (72 out of  
176 1,974) for HAT compared to 0.06% in Côte d'Ivoire and 0.88% in Uganda.<sup>40,41</sup> These findings  
177 suggest that the disease is still a significant health issue in Nigeria, and the country has not yet  
178 successfully eliminated *gambiense* Human African Trypanosomiasis (gHAT) as a public health  
179 concern.

180 Despite the World Health Organization reporting eight new HAT cases in Nigeria between 2010  
181 and 2016,<sup>42</sup> the results of this analysis present a different perspective. During this period, three of  
182 the studies included in this analysis collectively identified 72 HAT cases out of a total of 1,974  
183 individuals assessed, with the parasites isolated from 7 individuals.<sup>25</sup> This notable difference  
184 suggests that the actual prevalence of HAT in Nigeria might be underestimated. This could be  
185 attributed to the fact that identification of HAT cases has not been incorporated into routine  
186 diagnostic procedures in Nigeria's healthcare facilities despite being an endemic country.<sup>25</sup> This  
187 reflects the limited attention that HAT receives in endemic regions.<sup>43</sup>

### 188 **Prevalence of AAT in Nigeria**

189 This study has unveiled an overall prevalence rate of 27.3% for animal African trypanosomiasis,  
190 which is higher than the 16.1% in previous review.<sup>44</sup> This increased prevalence rate among animals  
191 in Nigeria raises additional concerns regarding their potential role in the transmission of African  
192 trypanosomiasis to humans. A notable finding from this study is the presence of the human-  
193 infective *T. brucei gambiense* in pigs, dogs, and cattle.<sup>33,37,38</sup> Similar findings have been  
194 documented in various sub-Saharan African nations.<sup>45,46,47</sup>

195 Although the precise role of these animal hosts in transmission is not entirely clear, their presence  
196 poses a potential threat to the goal of eliminating HAT transmission to humans by 2030.<sup>22</sup> While  
197 the zoonotic potential of *T. brucei gambiense* has been a subject of significant discussion over the  
198 years, the confirmation of its presence in animal hosts highlights the possibility of transmission  
199 between humans and animals. In Nigeria, the existence of these animal reservoirs could be  
200 contributing to the persistence and spread of Human African Trypanosomiasis (HAT).  
201 Furthermore, it might be a factor behind the limited success of the methods used to control and  
202 eliminate gambiense HAT. Therefore, it is crucial to conduct further research to gain a  
203 comprehensive understanding of the specific role played by these animal reservoirs in the  
204 transmission of HAT.

### 205 **The Diagnosis of Trypanosomiasis**

206 The diagnosis of trypanosomiasis relies on various methods like parasitological, serological, and  
207 molecular tests, each with different levels of accuracy, ease of use, and cost.<sup>8</sup> For instance, less  
208 sensitive diagnostic procedures are more likely to give false negative results, leading to an  
209 underestimation of the true prevalence of the disease. Conversely, more sensitive diagnostic tests  
210 can detect more positive cases that might be missed by less precise methods, resulting in higher  
211 reported prevalence rates.<sup>48,49</sup> Consequently, the choice of diagnostic methods and their accuracy  
212 can significantly affect the detection of infected individuals or animals and the reported prevalence  
213 rates.<sup>50</sup>

214 Microscopic examination was found to be the most used method for identifying trypanosomiasis  
215 infections in both animals and humans in this review. However, this method has faced criticism  
216 for its low sensitivity, especially in cases with low parasitemia characteristic of human infections  
217 with TbG, which can result in the underestimation of HAT prevalence rates.<sup>51</sup> On the other hand,

218 Polymerase Chain Reaction has been acknowledged as the preferred diagnostic method for  
219 epidemiological investigations concerning *Trypanosoma sp.* due to its high sensitivity and capacity  
220 for processing many samples.<sup>52</sup> This aligns with the results of this study, where the use of both  
221 microscopy and PCR on the same group of samples revealed that microscopic examination  
222 detected a lower prevalence rate compared to PCR.

223 As observed in one of the studies, the prevalence of AAT in cattle using microscopy was 15.1%  
224 while PCR detected a higher prevalence of 63.7%.<sup>31</sup> This substantial gap in prevalence rates can  
225 be attributed to the varying sensitivities of the two methods. Similarly, when examining *T. b.*  
226 *gambiense* infections in humans using the Card Agglutination Test for Trypanosomiasis (CATT)  
227 and PCR, different prevalence rates were detected.<sup>25</sup> CATT showed an overall prevalence rate of  
228 1.8%, whereas PCR indicated a lower rate of 0.6% among the same sampled population of 1200  
229 individuals. This discrepancy in prevalence rates between the two diagnostic techniques  
230 underscores the high specificity of PCR and the potential for false-positive results from CATT.<sup>53</sup>  
231 In addition, there exists a substantial likelihood of encountering false negative results, primarily  
232 attributable to discrepancies in antigen types utilized in the CATT assay kit especially in Nigeria  
233 and Cameroon. On the other hand, the lower prevalence detected with PCR could result from DNA  
234 extraction and handling methods in view of the low parasitemia characteristic of gHAT infections  
235 and may also reflect the chronicity of the infections in the sampled populations.

236 The variation in prevalence rates has also been linked to the capacity of diagnostic tools to identify  
237 trypanosomes down to the subspecies level. Unlike the PCR method, which has the capability to  
238 directly categorize trypanosomes based on their species classification,<sup>46</sup> the microscopy technique  
239 is limited in its ability to distinguish between different species and subspecies.<sup>37</sup> In this review, the

240 polymerase chain reaction approach was successful in detecting the human-infectious parasite *T.*  
241 *b. gambiense* in animals.<sup>37,38</sup>

242 In summary, the choice of diagnostic methods significantly impacts the reported prevalence rates  
243 of trypanosomiasis. This emphasizes the importance of carefully considering the methods used  
244 when interpreting and comparing prevalence data across different studies and locations. However,  
245 these choices are often influenced by factors like the availability of trained staff, cost, ease of use,  
246 and the diagnostic tool's useability.<sup>54</sup> Nigeria, being a developing nation, faces challenges related  
247 to limited resources, funding, and healthcare personnel. This may explain why microscopy is  
248 frequently used for trypanosomiasis detection in Nigeria compared to other methods as it requires  
249 minimal equipment and is a cost-effective way to detect the disease.<sup>8</sup>

## 250 **Conclusion**

251 This study highlighted the high prevalence rate of African trypanosomiasis infection in both  
252 humans and animals in Nigeria, evidence of the persistent threat that the disease poses to the health  
253 of humans and animals. The identification of pigs, dogs, and cattle as reservoir hosts for the  
254 human-infective parasite *Trypanosoma brucei gambiense* underscores the potential for cross-  
255 species transmission between humans and animals. Thus, highlighting the zoonotic potential of  
256 *gambiense* Human African Trypanosomiasis (gHAT). This presents a significant challenge to the  
257 2030 objective of eliminating gHAT as a public health concern and terminating its transmission to  
258 human populations.

259 To enhance the efficacy of disease control measures, additional research is imperative to elucidate  
260 the precise roles played by animal reservoir hosts and establish more effective diagnostic  
261 techniques for the detection of the trypanosomes in low resource endemic areas.

**Table I: Flow chart of study selection process**

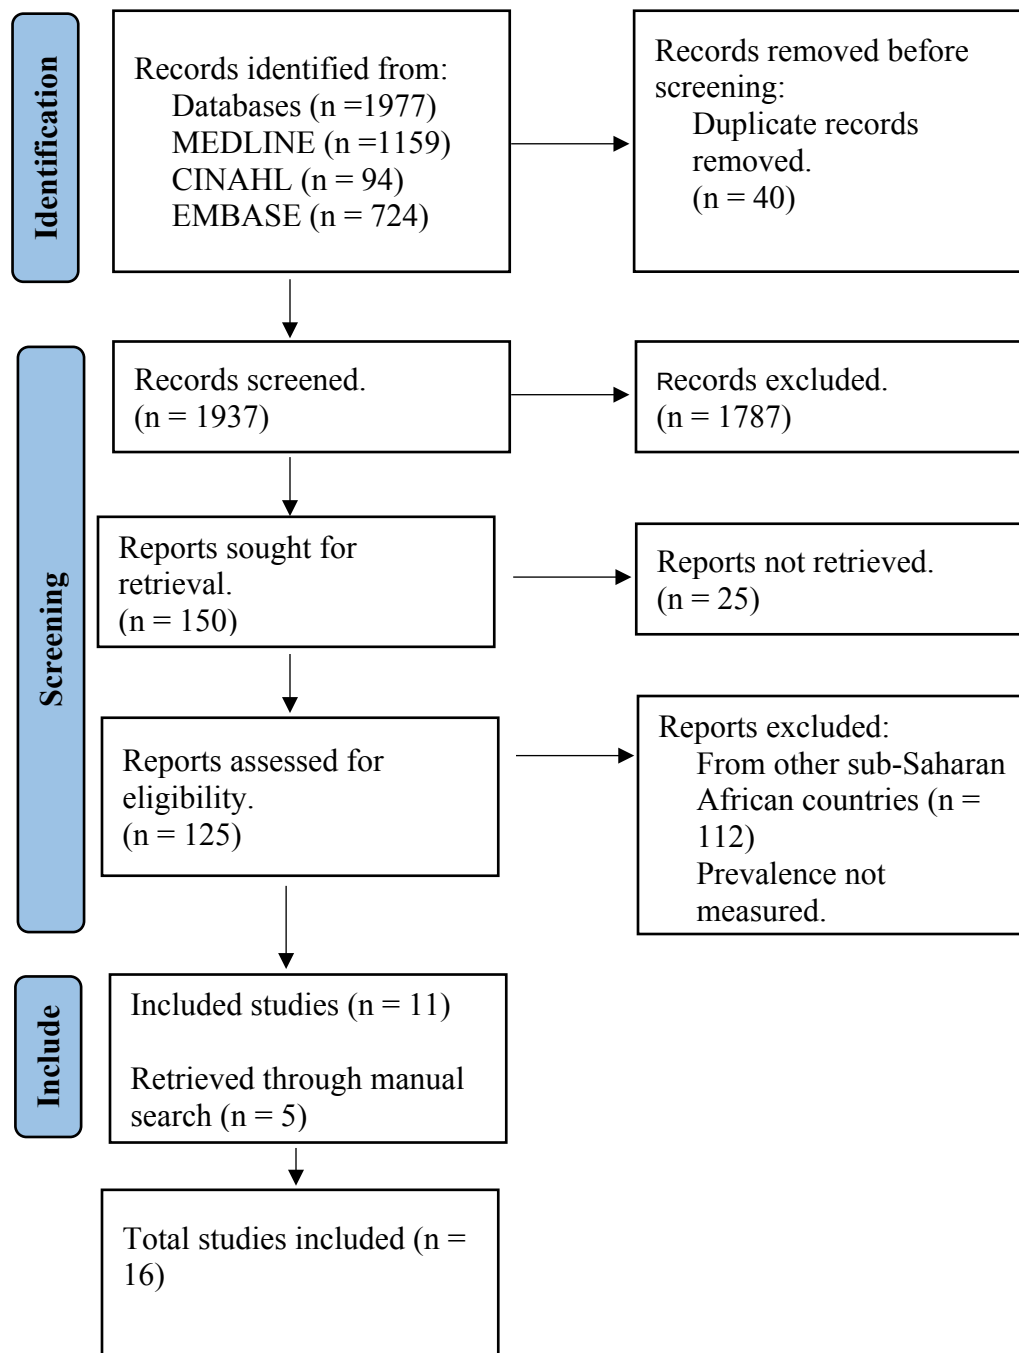

**Table II: Summary of the characteristics of the reviewed articles**

| Author/Year         | Title                                                                     | Aim                                                                                                                   | City/Area                                               | Study Design           | Study Population | Sample Size | Outcome Measured       | Result                                                                                                                                                                                                 | Prevalence rate | Diagnostic Method | Species Identified                                          |
|---------------------|---------------------------------------------------------------------------|-----------------------------------------------------------------------------------------------------------------------|---------------------------------------------------------|------------------------|------------------|-------------|------------------------|--------------------------------------------------------------------------------------------------------------------------------------------------------------------------------------------------------|-----------------|-------------------|-------------------------------------------------------------|
| Daniel et al., 1993 | Prevalence of bovine trypanosomiasis in Gongola State of Northern Nigeria | To assess the prevalence of bovine trypanosomiasis in Karim Lamido and Numan local government areas of Gongola State. | Adamawa: Formerly Gongola (Karim Lamido and Numan LGAs) | Cross-sectional Survey | Cattle           | 1065        | Bovine trypanosomiasis | A total of 42 (3.9 %) Cattle were found to be infected with trypanosomes. Out of which 27 (64.3 %) were due to <i>T. vivax</i> , 13 (31 %) to <i>T. congolense</i> and 2 (4.8 %) to <i>T. brucei</i> . | 3.90%           | Microscopy        | <i>T. vivax</i><br><i>T. congolense</i><br><i>T. brucei</i> |

|                      |                                                                                  |                                                                                                                          |                                  |                        |            |                               |                                |                                                                                                                                                                                                           |       |            |                                                             |
|----------------------|----------------------------------------------------------------------------------|--------------------------------------------------------------------------------------------------------------------------|----------------------------------|------------------------|------------|-------------------------------|--------------------------------|-----------------------------------------------------------------------------------------------------------------------------------------------------------------------------------------------------------|-------|------------|-------------------------------------------------------------|
| Daniel et al., 1994  | Prevalence of trypanosomiasis in sheep and goats in a region of northern Nigeria | To investigate the sensitivity of four techniques currently in use for the parasitological diagnosis of trypanosomiasis. | Bauchi (Alkaleri and Gombe LGAs) | Cross-sectional Survey | Sheep Goat | 615 (258 sheep and 357 goats) | Animal African trypanosomiasis | A total of 19 (7.4%) sheep and 18 (5.0%) goats were positive giving a total infection rate of 37 (6.0%), 22 being positive with <i>T. vivax</i> , 9 with <i>T. congolense</i> and 6 with <i>T. brucei</i> | 6%    | Microscopy | <i>T. vivax</i><br><i>T. congolense</i><br><i>T. brucei</i> |
| Enwezor et al., 2009 | Survey of bovine trypanosomiasis in the                                          | To assess the prevalence of trypanosomes in cattle at                                                                    | Kaduna                           | Cross-sectional Survey | Cattle     | 1293                          | Bovine trypanosomiasis         | A total of 109 cattle were infected with trypanosomes giving an overall prevalence                                                                                                                        | 8.40% | Microscopy | <i>T. vivax</i><br><i>T. congolense</i><br><i>e</i>         |

|                                               |                                                                                                |                                                                                                        |       |                                   |                                                     |                                                                    |                                          |                                                                                                                                                                                                                                     |       |                |                                                                                      |
|-----------------------------------------------|------------------------------------------------------------------------------------------------|--------------------------------------------------------------------------------------------------------|-------|-----------------------------------|-----------------------------------------------------|--------------------------------------------------------------------|------------------------------------------|-------------------------------------------------------------------------------------------------------------------------------------------------------------------------------------------------------------------------------------|-------|----------------|--------------------------------------------------------------------------------------|
|                                               | Kachia<br>Grazing<br>Reserve,<br>Kaduna<br>State,<br>Nigeria                                   | the Kachia<br>Grazing<br>Reserve<br>(KGR)                                                              |       |                                   |                                                     |                                                                    |                                          | of 8.4%. Out of these,<br>105 (96.3%) was due<br>to <i>T. vivax</i> , 2 (1.9%)<br>to <i>T. congolense</i> , 1<br>(0.9%) to <i>T. b. brucei</i><br>and a mixed infection<br>of <i>T. congolense</i> and<br><i>T. vivax</i> 1 (0.9%). |       |                | <i>T. brucei</i><br><br><i>brucei</i>                                                |
| Enwe<br>zor <i>et</i><br><i>al.</i> ,<br>2019 | Investigatio<br>n of<br>livestock<br>for presence<br>of<br>Trypanoso<br>ma brucei<br>gambiense | Aimed at<br>screening<br>livestock for<br>possible<br>presence of<br>T. b.<br>gambiense<br>within Tafa | Niger | Cross-<br>section<br>al<br>Survey | Cattle<br>Sheep<br>Goats<br>Local<br>dogs<br>Monkey | 460<br>animals<br>(177<br>cattle,<br>209<br>sheep,<br>61<br>goats, | Animal<br>African<br>trypanos<br>omiasis | A total of 10 animals<br>were positive for<br>trypanosomes with an<br>overall prevalence of<br>2.17 %. The<br>morphological<br>identification<br>indicated the presence                                                             | 2.17% | Microscop<br>y | <i>T. brucei</i><br><br><i>T.</i><br><i>congolens</i><br><i>e</i><br><i>T. vivax</i> |



|               |                                                                      |                                                                     |       |                   |        |                                          |                               |                                                                                                                                                                                                                                                                                                                                           |                      |                       |                                                            |
|---------------|----------------------------------------------------------------------|---------------------------------------------------------------------|-------|-------------------|--------|------------------------------------------|-------------------------------|-------------------------------------------------------------------------------------------------------------------------------------------------------------------------------------------------------------------------------------------------------------------------------------------------------------------------------------------|----------------------|-----------------------|------------------------------------------------------------|
|               | In Tafa<br>Local<br>Government<br>Area of<br>Niger State,<br>Nigeria | Local<br>Government<br>Area (LGA)<br>of Niger<br>State,<br>Nigeria. |       |                   |        | 12 local<br>dogs<br>and 1<br>monkey<br>) |                               | of <i>T. brucei</i> , <i>T. vivax</i><br>and a mixed infection<br>of <i>T. brucei</i> and <i>T.</i><br><i>congolense</i> . Details by<br>animal species<br>showed 3 cattle (1.69<br>%), 6 sheep (3.02 %)<br>and 1 goat (1.64 %)<br>infected with<br>trypanosomes. Neither<br>the dogs nor the<br>monkey was positive<br>for trypanosomes. |                      |                       |                                                            |
| Habee<br>b et | Molecular<br>identificatio<br>n and                                  | To<br>investigate<br>the                                            | Kwara | Cross-<br>section | Cattle | 398                                      | Bovine<br>trypanos<br>omiasis | A total of 3 Cattle<br>were positive by<br>microscopy,                                                                                                                                                                                                                                                                                    | Microscop<br>y: 0.8% | PCR<br>Microscop<br>y | <i>T. theileri</i><br><i>T. evansi</i><br><i>T. simiae</i> |

|                             |                                                                                                                        |                                                                                                                                                                                                  |  |                      |  |  |  |                                                                                                                                                          |                      |  |                                                                      |
|-----------------------------|------------------------------------------------------------------------------------------------------------------------|--------------------------------------------------------------------------------------------------------------------------------------------------------------------------------------------------|--|----------------------|--|--|--|----------------------------------------------------------------------------------------------------------------------------------------------------------|----------------------|--|----------------------------------------------------------------------|
| <p><i>al.</i>,<br/>2021</p> | <p>prevalence of trypanosomes in cattle distributed within the Jebba axis of the River Niger, Kwara state, Nigeria</p> | <p>prevalence of trypanosome infection in cattle, and molecularly identified the species of trypanosomes in infected cattle and the spatial distribution of trypanosome-infected herds along</p> |  | <p>al<br/>Survey</p> |  |  |  | <p>representing 0.8% prevalence, while 12 samples representing 3.0% tested positive by nested PCR. With <i>T. congolense</i> more prevalent (50.0%).</p> | <p>PCR:<br/>3.0%</p> |  | <p><i>T. congolense</i><br/><i>T. brucei</i><br/><i>T. vivax</i></p> |
|-----------------------------|------------------------------------------------------------------------------------------------------------------------|--------------------------------------------------------------------------------------------------------------------------------------------------------------------------------------------------|--|----------------------|--|--|--|----------------------------------------------------------------------------------------------------------------------------------------------------------|----------------------|--|----------------------------------------------------------------------|

|                           |                                                                                     |                                                                                                                                              |      |                        |                                 |                                            |                                |                                                                                                                                                                                                       |                                                                           |            |                                                            |
|---------------------------|-------------------------------------------------------------------------------------|----------------------------------------------------------------------------------------------------------------------------------------------|------|------------------------|---------------------------------|--------------------------------------------|--------------------------------|-------------------------------------------------------------------------------------------------------------------------------------------------------------------------------------------------------|---------------------------------------------------------------------------|------------|------------------------------------------------------------|
|                           |                                                                                     | the Jebba axis of the River Niger.                                                                                                           |      |                        |                                 |                                            |                                |                                                                                                                                                                                                       |                                                                           |            |                                                            |
| Kalu <i>et al.</i> , 1996 | Observations on the epidemiology of ruminant trypanosomiasis in Kano State, Nigeria | To evaluate the prevalence of trypanosomiasis among ruminants in Kano State and to elucidate aspects of the disease transmission in the area | Kano | Cross-sectional Survey | Ruminants (Cattle, sheep, goat) | 1424 (1106 cattle and 318 small ruminants) | Animal African trypanosomiasis | 59 cattle were infected with trypanosomes giving a prevalence of 5.3% with a confidence interval of $\pm 1.3$ . Three out of 318 small ruminants sampled were infected (prevalence $0.9\% \pm 1.0$ ). | Cattle: 5.3% (95% CI: 4.0–6.6%)<br>Sm all ruminants (95% CI: -0.1 – 1.9%) | Microscopy | <i>T. vivax</i><br><i>T. congolens</i><br><i>T. brucei</i> |

|                                                |                                                                                                                                                |                                                                                                                                                                                                                 |       |                                   |        |      |                                         |                                                                                                                                                                                                                                                                                                                      |                               |             |                                  |
|------------------------------------------------|------------------------------------------------------------------------------------------------------------------------------------------------|-----------------------------------------------------------------------------------------------------------------------------------------------------------------------------------------------------------------|-------|-----------------------------------|--------|------|-----------------------------------------|----------------------------------------------------------------------------------------------------------------------------------------------------------------------------------------------------------------------------------------------------------------------------------------------------------------------|-------------------------------|-------------|----------------------------------|
| Karsh<br>ima <i>et</i><br><i>al.</i> ,<br>2016 | Silent<br>Human<br>Trypanoso<br>ma brucei<br>gambiense<br>Infections<br>around the<br>Old Gboko<br>Sleeping<br>Sickness<br>Focus in<br>Nigeria | To conduct<br>an active<br>screening of<br>T. b.<br>gambiense in<br>humans in<br>the old<br>Gboko<br>sleeping<br>sickness<br>focus in<br>Nigeria and<br>characterized<br>isolates using<br>TgsGP-<br>polymerase | Gboko | Cross-<br>section<br>al<br>Survey | Humans | 1200 | Human<br>African<br>trypanos<br>omiasis | Out of sampled<br>people, a total of 28<br>were found positive.<br>The CATT revealed<br>an overall infection<br>rate of 1.8% of the<br>1200 samples studied.<br>PCR revealed an<br>overall infection rate<br>of 0.6% of the 1200<br>samples analysed.<br>Trypanosomes (TbG)<br>was isolated from 7 of<br>the samples | CATT:<br>1.8%<br>PCR:<br>0.6% | CATT<br>PCR | <i>T. b.</i><br><i>gambiense</i> |
|------------------------------------------------|------------------------------------------------------------------------------------------------------------------------------------------------|-----------------------------------------------------------------------------------------------------------------------------------------------------------------------------------------------------------------|-------|-----------------------------------|--------|------|-----------------------------------------|----------------------------------------------------------------------------------------------------------------------------------------------------------------------------------------------------------------------------------------------------------------------------------------------------------------------|-------------------------------|-------------|----------------------------------|

|                                 |                                                                                                           |                                                                                                                                     |       |                        |             |                             |                                |                                                                                                                                                                                                                                                                                      |                         |             |                                                                                                                                   |
|---------------------------------|-----------------------------------------------------------------------------------------------------------|-------------------------------------------------------------------------------------------------------------------------------------|-------|------------------------|-------------|-----------------------------|--------------------------------|--------------------------------------------------------------------------------------------------------------------------------------------------------------------------------------------------------------------------------------------------------------------------------------|-------------------------|-------------|-----------------------------------------------------------------------------------------------------------------------------------|
|                                 |                                                                                                           | chain reaction.                                                                                                                     |       |                        |             |                             |                                |                                                                                                                                                                                                                                                                                      |                         |             |                                                                                                                                   |
| Karsh<br>ima et<br>al.,<br>2016 | Animal reservoirs of Trypanosoma brucei gambiense around the old Gboko sleeping sickness focus in Nigeria | To ascertain the possible role of animal reservoirs in the epidemiology of the parasite in the old Gboko sleeping sickness focus in | Gboko | Cross-sectional Survey | Cattle Pigs | 1200 (600 Cattle, 600 Pigs) | Animal African trypanosomiasis | A total of 118 animals were positive (46 cattle, 72 pigs). The overall infection rates for the CATT and TgsGP-PCR were 8.9 and 0.9%, respectively. Trypanosomes of animal origin identified by ITS 1 PCR were <i>T. brucei</i> (4.2%), <i>T. congolense</i> forest (3.2%), <i>T.</i> | CATT: 8.9%<br>PCR: 0.9% | CATT<br>PCR | <i>T. brucei</i><br>( <i>T. b. gambiense</i> )<br><i>T. congolense forest</i><br><i>T. congolense savannah</i><br><i>T. vivax</i> |

Nigeria and characterized isolates using TgsGP polymerase chain reaction.

*congolense* savannah (2.0%), *T. vivax* (2.2%) and mixed infections (1.5%) in cattle as well as *T. brucei* (4.8%), *T. congolense* forest (1.8%), *T. congolense* savannah (1.0%) and mixed infections (1.2%) in pigs. *T. brucei gambiense* and other animal trypanosomes were identified among animals in the focus,

|                                  |                                                                                                         |                                                                                  |     |                        |        |      |                        |                                                                                                                                                                                                                                       |                      |     |                                                               |
|----------------------------------|---------------------------------------------------------------------------------------------------------|----------------------------------------------------------------------------------|-----|------------------------|--------|------|------------------------|---------------------------------------------------------------------------------------------------------------------------------------------------------------------------------------------------------------------------------------|----------------------|-----|---------------------------------------------------------------|
|                                  |                                                                                                         |                                                                                  |     |                        |        |      |                        | indicating the existence of animal reservoirs of human infective <i>T. b. gambiense</i> .                                                                                                                                             |                      |     |                                                               |
| Majekodunmi <i>et al.</i> , 2013 | A longitudinal survey of African animal trypanosomiasis in domestic cattle on the Jos Plateau, Nigeria: | To determine seasonal variations in the prevalence of AAT across the Jos Plateau | Jos | Cross-sectional Survey | Cattle | 7143 | Bovine trypanosomiasis | 3, 342 cattle were found positive. The prevalence of bovine trypanosomiasis was found to be high at 46.8% (39.0 – 54.5%) and significant, seasonal variation was observed between the dry and the end of the wet season. <i>T. b.</i> | 46.8% (39.0 – 54.5%) | PCR | <i>T. congolens</i><br><i>T. vivax</i><br><i>T. b. brucei</i> |

|                      |                                                                   |                                                                                 |               |                        |        |     |                               |                                                                                                                                                             |       |                    |                      |
|----------------------|-------------------------------------------------------------------|---------------------------------------------------------------------------------|---------------|------------------------|--------|-----|-------------------------------|-------------------------------------------------------------------------------------------------------------------------------------------------------------|-------|--------------------|----------------------|
|                      | Prevalence, distribution, and risk factors                        |                                                                                 |               |                        |        |     |                               | <i>brucei</i> was observed at a prevalence of 3.2% (1% – 5.5%); <i>T. congolense</i> at 27.7% (21.8% - 33.6%) and <i>T. vivax</i> at 26.7% (18.2% - 35.3%). |       |                    |                      |
| Nmor si et al., 2010 | Human African trypanosomiasis in endemic focus of Abraka, Nigeria | To investigate the prevalence of human African trypanosomiasis (HAT), caused by | Abraka, Delta | Cross-sectional Survey | Humans | 474 | Human African trypanosomiasis | Of the 474 screened, 44(9.3%) were seropositive with seroprevalence of 22(9.6%) in Urhouka, 14(9.5%) in Umeghe and 8(7.9%) for Ugonu.                       | 9.30% | Microscopy<br>CATT | <i>T.b.gambiense</i> |



|                    |                                                                 |                                                                                                                                                 |                             |                                   |      |      |                                |                                                                                                                                        |        |                |                                                               |
|--------------------|-----------------------------------------------------------------|-------------------------------------------------------------------------------------------------------------------------------------------------|-----------------------------|-----------------------------------|------|------|--------------------------------|----------------------------------------------------------------------------------------------------------------------------------------|--------|----------------|---------------------------------------------------------------|
|                    |                                                                 | Trypanosoma<br>brucei<br>gambiense in<br>an endemic<br>focus of<br>Nigeria, as it<br>relates to age,<br>sex and<br>occupational<br>differences. |                             |                                   |      |      |                                |                                                                                                                                        |        |                |                                                               |
| Omek<br>e,<br>1994 | Pig<br>trypanosom<br>osis:<br>prevalence<br>and<br>significance | To determine<br>the<br>prevalence of<br>trypanosome<br>species<br>pathogenic to                                                                 | Anambra and<br>Benue states | Cross-<br>section<br>al<br>Survey | Pigs | 1954 | Porcine<br>trypanos<br>omiasis | 524 (26.8 %) were<br>positive for<br>trypanosome<br>infections, 348 (66.5<br>%) of which had a<br>mixed <i>T. brucei</i> and <i>T.</i> | 26.80% | Microscop<br>y | <i>T.</i><br><i>congolens</i><br><i>e</i><br><i>T. brucei</i> |

|                       |                                                                |                                                                                               |       |                        |      |    |                         |                                                                                                                                                     |        |            |                                                    |
|-----------------------|----------------------------------------------------------------|-----------------------------------------------------------------------------------------------|-------|------------------------|------|----|-------------------------|-----------------------------------------------------------------------------------------------------------------------------------------------------|--------|------------|----------------------------------------------------|
|                       | in the endemic Middle Belt zone of southern Nigeria            | pigs and the significance of pig trypanosomiasis in the Middle Belt zone of Southern Nigeria. |       |                        |      |    |                         | <i>congolense</i> burden, while 125 (23.9 %) and 43 (8.2 %) others had single <i>T. brucei</i> and <i>T. congolense</i> infections respectively.    |        |            |                                                    |
| Onah and Ebenebe 2004 | Isolation of a human serum-resistant Trypanosoma brucei from a | To re-evaluate the role of domestic pig as a reservoir for <i>T. b. gambiense</i>             | Enugu | Cross-sectional Survey | Pigs | 85 | Porcine trypanosomiasis | 19 positive cases were identified from the 85 sampled pigs. 15 (78.96%) were identified as single infection because of <i>T. brucei</i> . While the | 22.35% | Microscopy | <i>T. brucei gambiense</i><br><i>T. congolense</i> |

|                            |                                                                                   |                                                                                                |                        |                        |        |     |                        |                                                                                                                                                             |                                                            |                |                                                             |
|----------------------------|-----------------------------------------------------------------------------------|------------------------------------------------------------------------------------------------|------------------------|------------------------|--------|-----|------------------------|-------------------------------------------------------------------------------------------------------------------------------------------------------------|------------------------------------------------------------|----------------|-------------------------------------------------------------|
|                            | naturally infected pig in the Nsukka area of Enugu State                          |                                                                                                |                        |                        |        |     |                        | remaining 4 (21.05%) were due to mixed infections of <i>T. brucei</i> and <i>T. congolense</i> .                                                            |                                                            |                |                                                             |
| Takee <i>et al.</i> , 2013 | Molecular survey of pathogenic trypanosomes in naturally infected Nigerian cattle | To determine the prevalence and characteristics of trypanosome species and strains in Nigerian | Ogun and Kaduna states | Cross-sectional Survey | Cattle | 411 | Bovine trypanosomiasis | Parasite detection by microscopy observation showed 62 samples infected by one or more species of Trypanosomes, for a prevalence of 15.1% (95% CI, 12–18%). | Microscopy: 15.1% (95% CI, 12–18%).<br>PCR: 63.7% (95% CI, | Microscopy PCR | <i>T. brucei</i><br><i>T. vivax</i><br><i>T. congolense</i> |

cattle using PCR for the first time.

PCR detection showed 262 samples infected by one or more species of *Trypanosoma*, for an overall prevalence of 63.7% (95% CI, 59.4–68.8%) and *T. congolense* was the most prevalent 48.7% (95% CI, 4.2–54.3), followed by *T. vivax* 26.0% (95% CI, 21.8–31.1%) and *T. brucei* 4.4% (95% CI, 3.3–7.1%).

59.4–68.8%)

|                          |                                                                                                      |                                                                                                     |        |                        |        |     |                               |                                                                                                                                                                                      |       |      |                        |
|--------------------------|------------------------------------------------------------------------------------------------------|-----------------------------------------------------------------------------------------------------|--------|------------------------|--------|-----|-------------------------------|--------------------------------------------------------------------------------------------------------------------------------------------------------------------------------------|-------|------|------------------------|
|                          |                                                                                                      |                                                                                                     |        |                        |        |     |                               | Prevalence of mixed infections was 13.9% (95% CI, 10.6–17.4%) being co-infection by <i>T. congolense</i> and <i>T. vivax</i> .                                                       |       |      |                        |
| Uba <i>et al.</i> , 2016 | Knowledge and prevalence of human african trypanosomiasis among residents of kachia grazing reserve. | To determine the knowledge, practices and prevalence of HAT among residents of the grazing reserve. | Kaduna | Cross-sectional Survey | Humans | 300 | Human African Trypanosomiasis | Of the 300 respondents that were examined and screened for HAT, none had palpable cervical lymph nodes enlargement, and none tested positive on CATT; hence HAT prevalence was zero. | 0.00% | CATT | <i>T. b. gambiense</i> |

|                                          |                                                                                            |                                                                                               |        |                                   |      |    |                                                   |                                                                                                                                            |                       |     |                                  |
|------------------------------------------|--------------------------------------------------------------------------------------------|-----------------------------------------------------------------------------------------------|--------|-----------------------------------|------|----|---------------------------------------------------|--------------------------------------------------------------------------------------------------------------------------------------------|-----------------------|-----|----------------------------------|
|                                          | reserve,<br>Kachia<br>local<br>government<br>area,<br>Kaduna<br>state,<br>Nigeria,<br>2012 |                                                                                               |        |                                   |      |    |                                                   |                                                                                                                                            |                       |     |                                  |
| Umea<br>kuana<br><i>et al.</i> ,<br>2019 | Identificatio<br>n of<br>Trypanoso<br>ma brucei<br>gambiense<br>in naturally<br>infected   | To determine<br>which<br>trypanosome<br>species,<br>cause canine<br>trypanosomo<br>sis in the | Nsukka | Cross-<br>section<br>al<br>Survey | Dogs | 19 | Canine<br>African<br>Trypanos<br>omiasis<br>(CAT) | All 19 dogs sampled<br>had canine<br>trypanosomosis<br>caused by<br>trypanosomes of the<br><i>T. brucei</i> group. Two<br>of the dogs were | <i>Tbg:</i><br>10.52% | PCR | <i>T. b.</i><br><i>gambiense</i> |

|            |                                                              |                                                                                           |        |                        |       |     |                                |                                                                                                                                                     |      |            |                                                             |
|------------|--------------------------------------------------------------|-------------------------------------------------------------------------------------------|--------|------------------------|-------|-----|--------------------------------|-----------------------------------------------------------------------------------------------------------------------------------------------------|------|------------|-------------------------------------------------------------|
|            | dogs in Nigeria                                              | Nsukka area of Nigeria and whether any dogs harbor the human-infective trypanosome, Tbg1. |        |                        |       |     |                                | shown to be infected with the human pathogen <i>T. b. gambiense</i> Group 1 (Tbg1).                                                                 |      |            |                                                             |
| Wayo, 2017 | Prevalence of trypanosomiasis in sheep in the Kachia grazing | To update information on the prevalence of trypanosomiasis in small ruminants in          | Kaduna | Cross-sectional Survey | Sheep | 110 | Animal African trypanosomiasis | A total of 45 (40.9%) animals were found positive. The trypanosomes observed were <i>T. congolense</i> (40.0%), <i>T. Brucei</i> (28.8%), <i>T.</i> | 40.9 | Microscopy | <i>T. brucei</i><br><i>T. vivax</i><br><i>T. congolense</i> |

|                                                    |                                                                                                                                |  |  |  |  |  |                                                         |  |  |  |
|----------------------------------------------------|--------------------------------------------------------------------------------------------------------------------------------|--|--|--|--|--|---------------------------------------------------------|--|--|--|
| reserve,<br>Kachia,<br>Kaduna<br>State,<br>Nigeria | the area, to<br>allow for<br>proper<br>planning of<br>control<br>activities and<br>serve as<br>valuable<br>scientific<br>data. |  |  |  |  |  | <i>vivax</i> (17.7%) and<br>mixed infections<br>(13.3%) |  |  |  |
|----------------------------------------------------|--------------------------------------------------------------------------------------------------------------------------------|--|--|--|--|--|---------------------------------------------------------|--|--|--|



## REFERENCES

1. Food and Agriculture Organization. The disease | Programme Against African Trypanosomosis (PAAT) | Food and Agriculture Organization of the United Nations. FAO Web site. <https://www.fao.org/paat/the-programme/the-disease/en/>. Updated 2024. Accessed Apr 9, 2024
2. Papagni R, Novara R, Minardi ML, et al. Human African Trypanosomiasis (sleeping sickness): Current knowledge and future challenges. *Frontiers in Tropical Diseases*. 2023;4. <https://www.frontiersin.org/articles/10.3389/ftd.2023.1087003>
3. Balasegaram M, Balasegaram S, Malvy D, Millet P. Neglected diseases in the news: a content analysis of recent international media coverage focussing on leishmaniasis and trypanosomiasis. *PLoS Negl Trop Dis*. 2008;2(5):e234. doi:10.1371/journal.pntd.0000234
4. Simarro PP, Diarra A, Ruiz Postigo JA, Franco JR, Jannin JG. The Human African Trypanosomiasis Control and Surveillance Programme of the World Health Organization 2000–2009: The Way Forward. *PLoS Negl Trop Dis*. 2011;5(2):e1007. doi:10.1371/journal.pntd.0001007
5. CDC. CDC - African Trypanosomiasis - Disease. CDC Web site. <https://www.cdc.gov/parasites/sleepingsickness/disease.html>. Updated 2020. Accessed Aug 15, 2023
6. Stevens JR, Brisse S. Systematics of trypanosomes of medical and veterinary importance. *CABI*. 2004:1–23. doi:10.1079/9780851994758.0001

7. Steverding D. The history of African trypanosomiasis. *Parasites & vectors*. 2008;1(1):1-8
8. Desquesnes M, Gonzatti M, Sazmand A, et al. A review on the diagnosis of animal trypanosomoses. *Parasit Vectors*. 2022;15(1):64. doi:10.1186/s13071-022-05190-1
9. Ponte-Sucre A. An Overview of Trypanosoma brucei Infections: An Intense Host–Parasite Interaction. *Front Microbiol*. 2016;7:2126. doi:10.3389/fmicb.2016.02126
10. World Health Organization. Trypanosomiasis, human African sleeping sickness. . : [https://www.who.int/news-room/fact-sheets/detail/trypanosomiasis-human-african-\(sleeping-sickness\)](https://www.who.int/news-room/fact-sheets/detail/trypanosomiasis-human-african-(sleeping-sickness)). Updated 2023. Accessed 13 November, 2023
11. Franco JR, Simarro PP, Diarra A, Jannin JG. Epidemiology of human African trypanosomiasis. *Clin Epidemiol*. 2014;6:257-275. doi:10.2147/CLEP.S39728
12. Brun R, Prof, Blum J, MD, Chappuis F, MD, Burri C, PhD. Human African trypanosomiasis. *Lancet*. 2010;375(9709):148-159. doi:10.1016/S0140-6736(09)60829-1
13. Lindner AK, Priotto G. The Unknown Risk of Vertical Transmission in Sleeping Sickness—A Literature Review. *PLOS Neglected Tropical Diseases*. 2010;4(12):e783. doi:10.1371/journal.pntd.0000783
14. Fèvre EM, Wissmann Bv, Welburn SC, Lutumba P. The Burden of Human African Trypanosomiasis. *PLOS Neglected Tropical Diseases*. 2008;2(12):e333. doi:10.1371/journal.pntd.0000333

15. Ilemobade AA. Tsetse and trypanosomosis in Africa: the challenges, the opportunities. *Onderstepoort J Vet Res.* 2009;76(1):35-40. doi:10.4102/ojvr.v76i1.59
16. World Health Organization. Accelerating work to overcome the global impact of neglected tropical diseases: a roadmap for implementation. <https://iris.who.int/handle/10665/338712>. Updated 2012. Accessed 9 April, 2024
17. Franco JR, Cecchi G, Priotto G, et al. Monitoring the elimination of human African trypanosomiasis at continental and country level: Update to 2018. *PLOS Neglected Tropical Diseases.* 2020;14(5):e0008261. doi:10.1371/journal.pntd.0008261
18. Molyneux DH, Hopkins DR, Zagaria N. Disease eradication, elimination and control: the need for accurate and consistent usage. *Trends in Parasitology.* 2004;20(8):347-351. doi:10.1016/j.pt.2004.06.004
19. Büscher P, Bart J, Boelaert M, et al. Do Cryptic Reservoirs Threaten Gambiense-Sleeping Sickness Elimination? *Trends Parasitol.* 2018;34(3):197-207. doi:10.1016/j.pt.2017.11.008
20. Geerts M, Chen Z, Bebronne N, et al. Deep kinetoplast genome analyses result in a novel molecular assay for detecting *Trypanosoma brucei* gambiense-specific minicircles. *NAR Genom Bioinform.* 2022;4(4):lqac081. doi:10.1093/nargab/lqac081
21. Franco JR, Simarro PP, Diarra A, Ruiz-Postigo JA, Jannin JG. The journey towards elimination of gambiense human African trypanosomiasis: not far, nor easy. *Parasitology.* 2014;141(6):748-760

22. Mehlitz D, Molyneux DH. The elimination of *Trypanosoma brucei gambiense*? Challenges of reservoir hosts and transmission cycles: Expect the unexpected. *Parasite Epidemiology and Control*. 2019;6:e00113

23. Moher D, Shamseer L, Clarke M, et al. Preferred reporting items for systematic review and meta-analysis protocols (PRISMA-P) 2015 statement. *Systematic Reviews*. 2015;4(1):1. doi:10.1186/2046-4053-4-1

24. Nmorsi OPG, Isaac C, Igbinosa IB, Umukoro DO, Aitaikuru DP. Human African trypanosomiasis in endemic focus of Abraka, Nigeria. *Asian Pacific Journal of Tropical Medicine*. 2010;3(6):448-450. doi:10.1016/S1995-7645(10)60107-1

25. Solomon Ngutor K, Idris LA, Oluseyi Oluyinka O. Silent Human *Trypanosoma brucei gambiense* Infections around the Old Gboko Sleeping Sickness Focus in Nigeria. *Journal of parasitology research; J Parasitol Res*. 2016;2016:2656121-5. doi:10.1155/2016/2656121

26. Uba BV, Aliyu A, Abubakar A, et al. Knowledge and prevalence of human african trypanosomiasis among residents of kachia grazing reserve, Kachia local government area, Kaduna state, Nigeria, 2012. *Pan African Medical Journal*. 2016;23. doi:10.11604/pamj.2016.23.89.7999

27. Daniel AD, Dadah AJ, Kalejaiye JO, Dalhatu AD. Prevalence of bovine trypanosomiasis in Gongola State of Northern Nigeria. *Rev Elev Med Vet Pays Trop*. 1993;46(4):571-574. <https://search.ebscohost.com/login.aspx?direct=true&db=mnh&AN=7915428&site=ehost-live>

28. Enwezor FNC, Umoh JU, Esievo KAN, Halid I, Zaria LT, Anere JI. Survey of bovine trypanosomosis in the Kachia Grazing Reserve, Kaduna State, Nigeria. *Vet Parasitol.* 2009;159(2):121-125. doi:10.1016/j.vetpar.2008.10.032
29. Habeeb IF, Chechet GD, Kwaga JKP. Molecular identification and prevalence of trypanosomes in cattle distributed within the Jebba axis of the River Niger, Kwara state, Nigeria. *Parasites & vectors.* 2021;14(1):560. doi:10.1186/s13071-021-05054-0
30. Majekodunmi AO, Fajinmi A, Dongkum C, Picozzi K, Thrusfield MV, Welburn SC. A longitudinal survey of African animal trypanosomiasis in domestic cattle on the Jos Plateau, Nigeria: Prevalence, distribution and risk factors. *Parasites and Vectors.* 2013;6(1). doi:10.1186/1756-3305-6-239
31. Takeet MI, Fagbemi BO, De Donato M, et al. Molecular survey of pathogenic trypanosomes in naturally infected Nigerian cattle. *Res Vet Sci.* 2013;94(3):555-561. doi:10.1016/j.rvsc.2012.10.018
32. Omeke BC. Pig trypanosomosis: prevalence and significance in the endemic Middle Belt zone of southern Nigeria. *Rev Elev Med Vet Pays Trop.* 1994;47(4):381-386. <https://search.ebscohost.com/login.aspx?direct=true&db=mnh&AN=7770662&site=ehost-live>
33. Onah D, Ebenebe O. Isolation of a human serum-resistant *Trypanosoma brucei* from a naturally infected pig in the Nsukka area of Enugu State. *Nigerian Veterinary Journal.* 2004;24. doi:10.4314/nvj.v24i1.3435

34. Daniel AD, Joshua RA, Kalejaiye JO, Dada AJ. Prevalence of trypanosomiasis in sheep and goats in a region of northern Nigeria. *Rev Elev Med Vet Pays Trop.* 1994;47(3):295-297.

<https://search.ebscohost.com/login.aspx?direct=true&db=mnh&AN=7709031&site=ehost-live>

35. Kalu AU, Lawani FA. Observations on the epidemiology of ruminant trypanosomosis in Kano State, Nigeria. *Rev Elev Med Vet Pays Trop.* 1996;49(3):213-217.

<https://search.ebscohost.com/login.aspx?direct=true&db=mnh&AN=9091992&site=ehost-live>

36. Wayo B, Samdi SM, Fajinmi AO, et al. Prevalence of trypanosomiasis in sheep in the Kachia grazing reserve, Kachia, Kaduna State, Nigeria. *African Journal of Clinical and Experimental Microbiology.* 2017;18(2):120-123. doi:10.4314/ajcem.v18i2.10

37. Umeakuana PU, Gibson W, Ezeokonkwo RC, Anene BM. Identification of *Trypanosoma brucei gambiense* in naturally infected dogs in Nigeria. *Parasit Vectors.* 2019;12(1):420. doi:10.1186/s13071-019-3680-8

38. Solomon NK, Lawal I, Shalangwa I, et al. Animal reservoirs of *Trypanosoma brucei gambiense* around the old Gboko sleeping sickness focus in Nigeria. 2016;8:47-54. doi:10.5897/JPVB2015.0228

39. Enwezor F, Emmanuel R, Olanrewaju T, et al. Investigation of livestock for presence of *Trypanosoma brucei gambiense* in Tafa Local Government Area of Niger State, Nigeria  
INVESTIGATION OF LIVESTOCK FOR PRESENCE OF TRYPANOSOMA BRUCEI  
GAMBIENSE IN TAFALocal Government Area of Niger State, Nigeria.  
2019

40. Selby R, Wamboga C, Erphas O, et al. Gambian human African trypanosomiasis in North West Uganda. Are we on course for the 2020 target? *PLoS Negl Trop Dis*. 2019;13(8):e0007550. doi:10.1371/journal.pntd.0007550
41. Koné M, Kaba D, Kaboré J, et al. Passive surveillance of human African trypanosomiasis in Côte d'Ivoire: Understanding prevalence, clinical symptoms and signs, and diagnostic test characteristics. *PLOS Neglected Tropical Diseases*. 2021;15(8):e0009656. doi:10.1371/journal.pntd.0009656
42. WHO. GHO | By category | Number of new reported cases (T.b. gambiense) - Data by country. WHO Web site. <https://apps.who.int/gho/data/node.main.A1636?lang=en>. Updated 2023. Accessed Aug 21, 2023
43. Mwiinde AM, Simuunza M, Namangala B, et al. Healthcare Management of Human African Trypanosomiasis Cases in the Eastern, Muchinga and Lusaka Provinces of Zambia. *Trop Med Infect Dis*. 2022;7(10):270. doi:10.3390/tropicalmed7100270
44. Odeniran PO, Ademola IO. A meta-analysis of the prevalence of African animal trypanosomiasis in Nigeria from 1960 to 2017. 2018;11(1):280. doi:10.1186/s13071-018-2801-0
45. Boundenga L, Mombo IM, Augustin M, et al. Molecular Identification of Trypanosome Diversity in Domestic Animals Reveals the Presence of *Trypanosoma brucei gambiense* in Historical Foci of Human African Trypanosomiasis in Gabon. *Pathogens*. 2022;11(9):992. doi:10.3390/pathogens11090992

46. Simo G, Asonganyi T, Nkinin SW, Njiokou F, Herder S. High prevalence of *Trypanosoma brucei gambiense* group 1 in pigs from the Fontem sleeping sickness focus in Cameroon. *Vet.Parasitol.* 2006;139(1):57-66. doi:10.1016/j.vetpar.2006.02.026
47. Njiokou F, Nimpaye H, Simo G, et al. Domestic animals as potential reservoir hosts of *Trypanosoma brucei gambiense* in sleeping sickness foci in Cameroon. *Parasite.* 2010;17(1):61-66. doi:10.1051/parasite/2010171061
48. Hall MK, Kea B, Wang R. Recognising Bias in Studies of Diagnostic Tests Part 1: Patient Selection. *Emerg Med J.* 2019;36(7):431-434. doi:10.1136/emered-2019-208446
49. Shreffler J, Huecker MR. Diagnostic Testing Accuracy: Sensitivity, Specificity, Predictive Values and Likelihood Ratios. In: Diagnostic Testing Accuracy: Sensitivity, Specificity, Predictive Values and Likelihood Ratios. In: *StatPearls* StatPearls Publishing; 2023. <http://www.ncbi.nlm.nih.gov/books/NBK557491/>. Accessed Aug 29, 2023
50. Okello I, Mafie E, Eastwood G, Nzalawahe J, Mboera LE. African animal trypanosomiasis: A systematic review on prevalence, risk factors and drug resistance in sub-Saharan Africa. *J.Med.Entomol.* 2022;59(4):1099-1143
51. Picozzi K, Tilley A, Fevre EM, et al. The diagnosis of trypanosome infections: applications of novel technology for reducing disease risk. 2002;1(2):39-45
52. Contreras Garcia M, Walshe E, Steketee PC, et al. Comparative Sensitivity and Specificity of the 7SL sRNA Diagnostic Test for Animal Trypanosomiasis. 2022;9. <https://www.frontiersin.org/articles/10.3389/fvets.2022.868912>



53. Inojosa WO, Augusto I, Bisoffi Z, et al. Diagnosing human African trypanosomiasis in Angola using a card agglutination test: observational study of active and passive case finding strategies. *BMJ*. 2006;332(7556):1479. doi:10.1136/bmj.38859.531354.7C

54. Chappuis François, Louis L, Pere S, Veerle L, Büscher Philippe. Options for Field Diagnosis of Human African Trypanosomiasis. *Clin.Microbiol.Rev.* 2005;18(1):133-146.

doi:10.1128/cmr.18.1.133-146.2005
